# Supplementary material for: Human mesenchymal stem cells creating an immunosuppressive environment and promote breast cancer in mice
Source: PubMed Central journal article supplement — Sci Rep. 2013 Jul 29;3:2298. doi: 10.1038/srep02298 (PMC3725512; doi:10.1038/srep02298), 2013-07-29
Supplement: srep02298-s1.pdf [file srep02298-s1.pdf]

# Human mesenchymal stem cells creating an immunosuppressive environment and promote breast cancer in mice

---

Biljana Ljujic<sup>1</sup>, Marija Milovanovic<sup>1</sup>, Vladislav Volarevic<sup>1</sup>, Bridgid Murray<sup>2</sup>, Diana Bugarski<sup>3</sup>, Stefan Przyborski<sup>2</sup>, Nebojsa Arsenijevic<sup>1</sup>, Miodrag L. Lukic<sup>1</sup> & Miodrag Stojkovic<sup>1</sup>

## Supplemental data

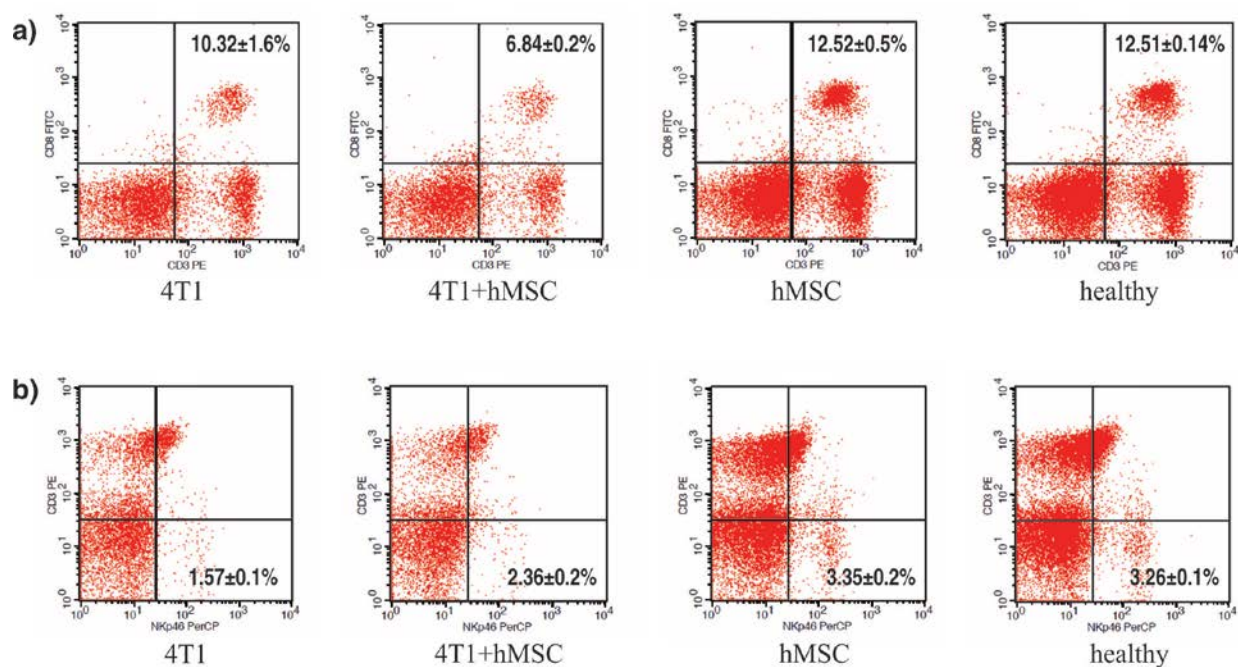

**Figure S1.** Flow cytometry analysis of splenocytes phenotype. Splenocytes phenotype was analyzed by flow cytometry using a combination of cell surface markers.

**a)** Dotplots representative of cell cultures showed homogeneous population positive for CD3 and CD8 cell surface markers.

**b)** Dotplots representative of cell cultures showed homogeneous population negative for CD3 and positive for NKp46 cell surface markers.
